# Supplementary material for: CHD6 eviction of promoter nucleosomes maintains housekeeping transcriptional program in prostate cancer
Source: PubMed Central journal article supplement — Mol Ther Nucleic Acids. 2024 Nov 16;35(4):102397. doi: 10.1016/j.omtn.2024.102397 (PMC11665337; doi:10.1016/j.omtn.2024.102397), 2024-11-16
Supplement: mmc1.pdf [file mmc1.pdf]

**OMTN, Volume 35**

**Supplemental information**

**CHD6 eviction of promoter nucleosomes  
maintains housekeeping transcriptional  
program in prostate cancer**

**Lina Bu, Shaodong Huang, Ziyang Rao, Chenyang Wu, Bryan-Yu Sun, Yanhua Liu, Lin He, and Dongyu Zhao**

**Table S1. Summary of available data used in the study.**

| Data name      | Data type | Cell           | Cell type | ID (GEO database) |
|----------------|-----------|----------------|-----------|-------------------|
| HEK293         | CUT&Tag   | HEK293         | Normal    | GSE264397         |
| HEK293         | CUT&Tag   | HEK293         | Normal    | GSE264397         |
| HEK293         | CUT&Tag   | HEK293         | Normal    | GSE264397         |
| Cardiomyocytes | ChIP-seq  | Cardiomyocytes | Normal    | GSE136057         |
| Cardiomyocytes | ChIP-seq  | Cardiomyocytes | Normal    | GSE136057         |
| Cardiomyocytes | ChIP-seq  | Cardiomyocytes | Normal    | GSE136057         |
| Cardiomyocytes | ChIP-seq  | Cardiomyocytes | Normal    | GSE136057         |
| PolII          | ChIP-seq  | C4-2           | Cancer    | GSE55615          |
| H3K4me3        | ChIP-seq  | C4-2           | Cancer    | GSE55615          |
| H3K4me1        | ChIP-seq  | C4-2           | Cancer    | GSE55615          |
| H3K27ac        | ChIP-seq  | C4-2B          | Cancer    | GSE105424         |
| H3K27ac        | ChIP-seq  | C4-2B          | Cancer    | GSE105424         |
| H3K36me3       | ChIP-seq  | C4-2B          | Cancer    | GSE118629         |
| H3K36me3       | ChIP-seq  | C4-2B          | Cancer    | GSE118629         |
| H3K9me3        | ChIP-seq  | C4-2B          | Cancer    | GSE118629         |
| H3K9me3        | ChIP-seq  | C4-2B          | Cancer    | GSE118629         |
| H3K27me3       | ChIP-seq  | C4-2B          | Cancer    | GSE118629         |
| H3K27me3       | ChIP-seq  | C4-2B          | Cancer    | GSE118629         |
| MNase          | MNase-seq | C4-2           | Cancer    | GSE214212         |
| MNase          | MNase-seq | C4-2           | Cancer    | GSE214212         |
| MNase          | MNase-seq | C4-2           | Cancer    | GSE214212         |
| MNase          | MNase-seq | C4-2           | Cancer    | GSE214212         |
| MNase          | MNase-seq | C4-2           | Cancer    | GSE214212         |
| MNase          | MNase-seq | C4-2           | Cancer    | GSE214212         |
| MNase          | MNase-seq | C4-2           | Cancer    | GSE214212         |
| ATAC           | ATAC-seq  | C4-2B          | Cancer    | GSE145409         |
| BPH1           | RNA-seq   | BPH1           | Normal    | GSE210205         |
| BPH1           | RNA-seq   | BPH1           | Normal    | GSE210205         |
| BPH1           | RNA-seq   | BPH1           | Normal    | GSE210205         |
| BPH1           | RNA-seq   | BPH1           | Normal    | GSE210205         |
| PrEC           | RNA-seq   | PrEC           | Normal    | GSE70466          |
| PrEC           | RNA-seq   | PrEC           | Normal    | GSE70466          |
| PrEC           | RNA-seq   | PrEC           | Normal    | GSE70466          |
| RWPE1          | RNA-seq   | RWPE1          | Normal    | GSE118629         |
| RWPE1          | RNA-seq   | RWPE1          | Normal    | GSE118629         |
| RWPE1          | RNA-seq   | RWPE1          | Normal    | GSE118629         |
| DU145          | RNA-seq   | DU145          | Cancer    | GSE210205         |
| DU145          | RNA-seq   | DU145          | Cancer    | GSE210205         |
| DU145          | RNA-seq   | DU145          | Cancer    | GSE210205         |
| DU145          | RNA-seq   | DU145          | Cancer    | GSE210205         |

|       |           |       |        |           |
|-------|-----------|-------|--------|-----------|
| PC3   | RNA-seq   | PC3   | Cancer | GSE210205 |
| PC3   | RNA-seq   | PC3   | Cancer | GSE210205 |
| PC3   | RNA-seq   | PC3   | Cancer | GSE210205 |
| PC3   | RNA-seq   | PC3   | Cancer | GSE210205 |
| 22RV1 | RNA-seq   | 22RV1 | Cancer | GSE214585 |
| 22RV1 | RNA-seq   | 22RV1 | Cancer | GSE214585 |
| 22RV1 | RNA-seq   | 22RV1 | Cancer | GSE214585 |
| 22RV1 | RNA-seq   | 22RV1 | Cancer | GSE214585 |
| LNcap | RNA-seq   | LNcap | Cancer | GSE193468 |
| LNcap | RNA-seq   | LNcap | Cancer | GSE193468 |
| LNcap | RNA-seq   | LNcap | Cancer | GSE193468 |
| LNcap | RNA-seq   | LNcap | Cancer | GSE193468 |
| LNcap | RNA-seq   | LNcap | Cancer | GSE193468 |
| LNcap | RNA-seq   | LNcap | Cancer | GSE193468 |
| LNcap | RNA-seq   | LNcap | Cancer | GSE193468 |
| LNcap | RNA-seq   | LNcap | Cancer | GSE193468 |
| LNcap | RNA-seq   | LNcap | Cancer | GSE193468 |
| LNcap | RNA-seq   | LNcap | Cancer | GSE193468 |
| LNcap | RNA-seq   | LNcap | Cancer | GSE193468 |
| LNcap | RNA-seq   | LNcap | Cancer | GSE193468 |
| LNcap | RNA-seq   | LNcap | Cancer | GSE193468 |
| LNcap | RNA-seq   | LNcap | Cancer | GSE193468 |
| VCaP  | RNA-seq   | VCaP  | Cancer | GSE136272 |
| VCaP  | RNA-seq   | VCaP  | Cancer | GSE136272 |
| VCaP  | RNA-seq   | VCaP  | Cancer | GSE136272 |
| C4-2  | RNA-seq   | C4-2  | Cancer | GSE214212 |
| C4-2  | RNA-seq   | C4-2  | Cancer | GSE214212 |
| C4-2  | RNA-seq   | C4-2  | Cancer | GSE214212 |
| CRPC  | scRNA-seq | CRPC  | Cancer | GSE137829 |
| CRPC  | scRNA-seq | CRPC  | Cancer | GSE137829 |
| CRPC  | scRNA-seq | CRPC  | Cancer | GSE137829 |
| CRPC  | scRNA-seq | CRPC  | Cancer | GSE137829 |
| CRPC  | scRNA-seq | CRPC  | Cancer | GSE137829 |
| CRPC  | scRNA-seq | CRPC  | Cancer | GSE137829 |
| CRPC  | scRNA-seq | CRPC  | Cancer | GSE137829 |
| CRPC  | scRNA-seq | CRPC  | Cancer | GSE137829 |
| CRPC  | scRNA-seq | CRPC  | Cancer | GSE137829 |
| CRPC  | scRNA-seq | CRPC  | Cancer | GSE137829 |
| CRPC  | scRNA-seq | CRPC  | Cancer | GSE137829 |
| CRPC  | scRNA-seq | CRPC  | Cancer | GSE137829 |
| CRPC  | scRNA-seq | CRPC  | Cancer | GSE137829 |
| CRPC  | scRNA-seq | CRPC  | Cancer | GSE137829 |

**Table S2. Overlapping genes with sharp CHD6 peaks between HEK293 and cardiomyocytes.**

|          |          |          |          |          |          |
|----------|----------|----------|----------|----------|----------|
| TMEM55B  | MRPL54   | ELK1     | SGTA     | ZFYVE16  | CC2D1B   |
| BLOC1S3  | MLH1     | ZNF345   | RPS26    | ATP6V0B  | AP4M1    |
| MRPS18B  | SKA2     | CAPN10   | ATP6V1G1 | WDR77    | HSPA13   |
| TRAPPC6A | ATP5G1   | HSPA9    | ARID4A   | AATF     | UBE2Q1   |
| CALR     | EXOC8    | CDV3     | SLC20A1  | CNPY3    | DNAJB9   |
| ZBTB37   | SERBP1   | BUB3     | DNAJC16  | AHSA1    | RMND1    |
| CD164    | THAP5    | DUS3L    | AP4B1    | FBXO17   | HSP90B1  |
| ASNA1    | PRR3     | C1orf174 | PNISR    | SH2B3    | ARPC5    |
| USP5     | BCLAF1   | SFR1     | PSMD10   | NOL6     | UBE2S    |
| SRSF2    | ATF2     | DCLRE1B  | YIF1A    | COMMD4   | HMGN4    |
| NFKBIB   | UBAP2L   | TCEANC2  | UBE4B    | SNX12    | THNSL1   |
| ZNF687   | CNOT1    | UVRAG    | M6PR     | WDR3     | ALDH6A1  |
| GLA      | CD3EAP   | CEP95    | SLC2A4   | DCTPP1   | SDR39U1  |
| SNRPD2   | GIPC1    | C1orf43  | GANC     | S100A1   | ILVBL    |
| HNRNPH2  | COX14    | C7orf25  | ZNF318   | RRAGC    | PIAS4    |
| TRAF7    | EPM2AIP1 | FAM192A  | VPS33A   | PPP1R15B | BLOC1S1  |
| MPND     | OSGEP    | POLR2A   | DES11    | PRDX6    | LAMP1    |
| APEX1    | PABPN1   | HNRNPDL  | LAMTOR4  | DNAJC13  | IMP4     |
| ZNF576   | YBX1     | GLYR1    | CSTB     | PQBP1    | DACT3    |
| C5orf51  | DOLK     | FAM76A   | RBM39    | ALDH3A2  | BAX      |
| CATSPERD | HIST1H4H | RPL19    | FOXO1    | ZMAT5    | TMEM185B |
| SWSAP1   | RPS12    | HMBBOX1  | RPS28    | FAF1     | PET100   |
| QPCTL    | CD2BP2   | TSR3     | TSNAX    | NBR1     | CENPL    |
| CYB5D1   | FNIP1    | UQCR11   | PMVK     | TMEM59   | FAM179B  |
| C19orf47 | HMGN1    | CCDC151  | RPL9     | MDH1     | SUPV3L1  |
| SHPK     | CDK5     | KIAA1009 | ZNF706   | RPL39    | ULK3     |
| CCNYL1   | CNPY4    | GTF2F1   | SOCS5    | CCT8     | ZNF526   |
| WBP1     | MBTD1    | PHB      | PHF5A    | PRELID1  | TMEM131  |
| ORC6     | KLRG1    | WDR75    | TMTC3    | OTUD1    | CHCHD4   |
| RBM42    | UVSSA    | PSMB3    | MTF1     | MAX      | RUVBL2   |
| LIN37    | HPS5     | MIEN1    | FAM168B  | FGFR1OP2 | PARP6    |
| ZNF181   | GTF2H1   | NPAT     | FEN1     | RPAIN    | TXLNG    |
| IER5     | ZNF865   | SRSF1    | RPA1     | LCN12    | ENKUR    |
| UBTD1    | C8orf44  | TOP3A    | EIF3A    | EXOSC1   | RPL23    |
| RIBC1    | KIF20A   | SPAG5    | UBE2C    | NAGA     | ZNF503   |
| DXO      | HNRNPD   | SIRT1    | POLE3    | EME1     | PRPF38A  |
| ZBTB5    | CREB3L4  | MLX      | PLEKHH3  | C12orf49 | ALOXE3   |
| C6orf211 | CCDC115  | RELL1    | UBL5     | TIMM17B  | MMS19    |
| TMEM116  | ETF1     | AP5Z1    | AKR7A2   | NGRN     | RNF41    |

|        |       |       |         |         |         |
|--------|-------|-------|---------|---------|---------|
| TIA1   | H2AFV | DERL3 | RBM23   | RBX1    | MRPL55  |
| NTHL1  | ZFP91 | USO1  | PPIP5K2 | HINFP   | PPP1R3D |
| UROD   | GK    | G6PC3 | WDR92   | B3GALT6 | SLC35A5 |
| MYL12A |       |       |         |         |         |

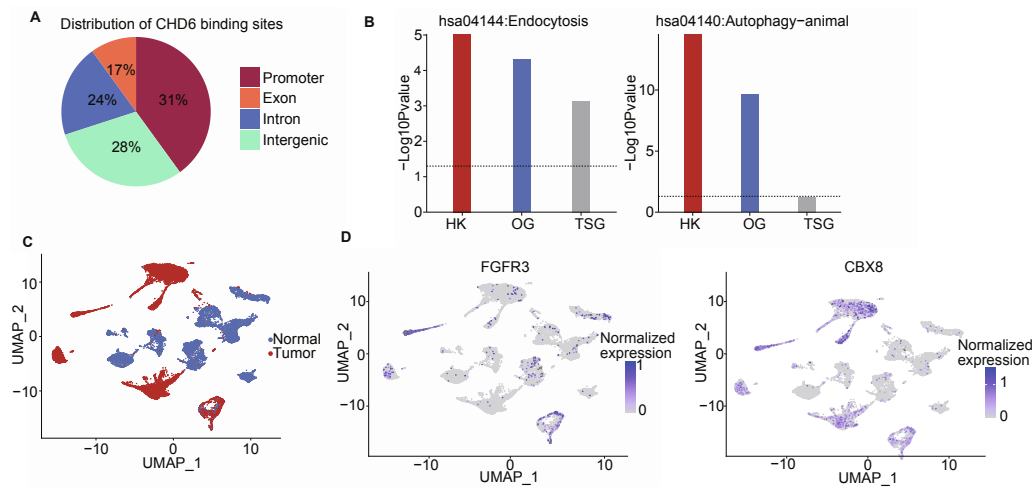

**Figure S1. Distribution characteristics of the CHD6 binding sites.**

(A) Distribution of CHD6 binding sites. (B) housekeeping genes (HK), oncogenes (OG) and tumor suppressors genes (TSG) are equally enriched in the KEGG pathways in endocytosis (left), and HK genes, and OG are equally enriched in the KEGG Pathways in autophagy-animal (right). (C) Distribution of tumor and normal cells using scRNA-seq. (D) Expression levels of the oncogene *FGFR3* and *CBX8* in tumor and normal cells. The P values determined using one tail Wilcoxon test.

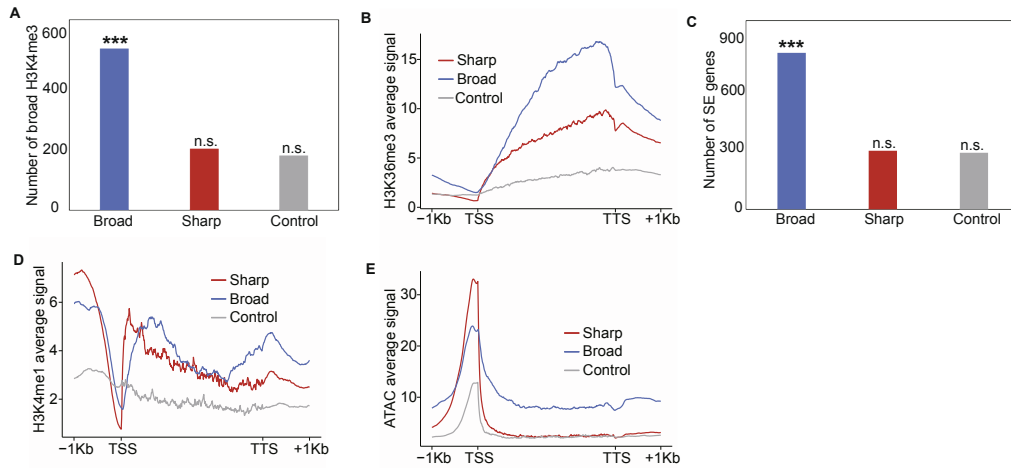

**Figure S2. Binding models of CHD6 that differ in epigenetic modifications.**

(A) Comparison of the overlap of different genes with broad H3K4me3. (B) Average ChIP-Seq signal value of H3K36me3 plotted around groups. (C) Comparison of the overlap of different genes with super enhancer genes. (D) Average ChIP-Seq signal value of H3K4me1 plotted around different genes. (E) Average ATAC signal value plotted around different groups. P values determined using one tail Wilcoxon test.  $*p < 0.05$ ;  $**p < 0.01$ ;  $***p < 0.001$ . n.s., not significant.

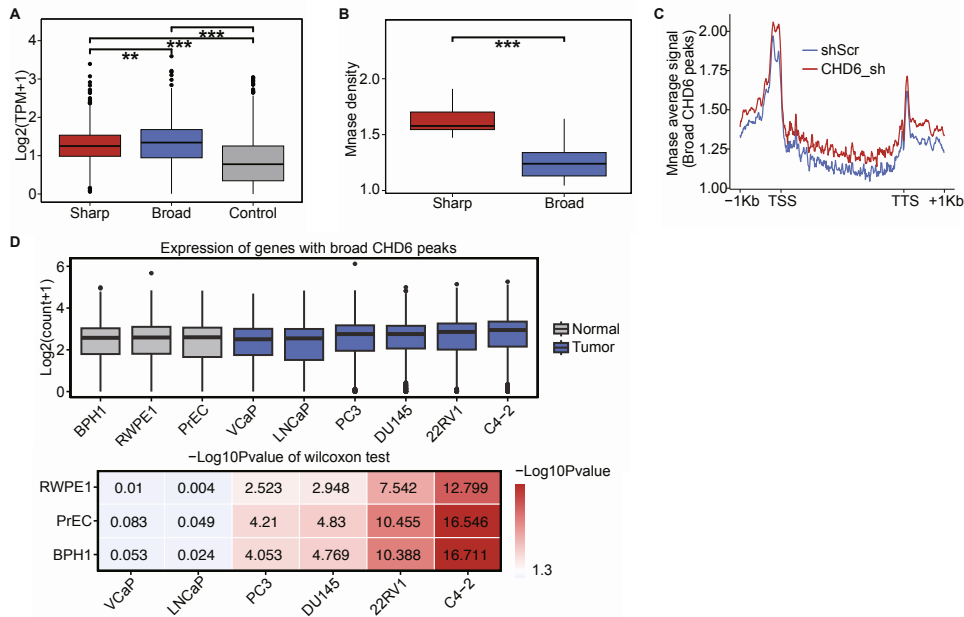

**Figure S3. Higher nucleosome density of the genes with sharp CHD6 peaks than that of the genes with broad CHD6 peaks.**

(A) Expression levels of genes determined from the GTEx tissue dataset. (B) The nucleosome density of the genes with sharp CHD6 peaks is significantly higher than those of the genes with broad CHD6 peaks. (C) Nucleosomes density of broad CHD6 peaks in both the C4-2 control cells and CHD6 knockdown cells. (D) Gene expression levels showing notable variations and significant differences between normal and cancer cell lines. P values determined using one tail Wilcoxon test.  $*p < 0.05$ ;  $**p < 0.01$ ;  $***p < 0.001$ .



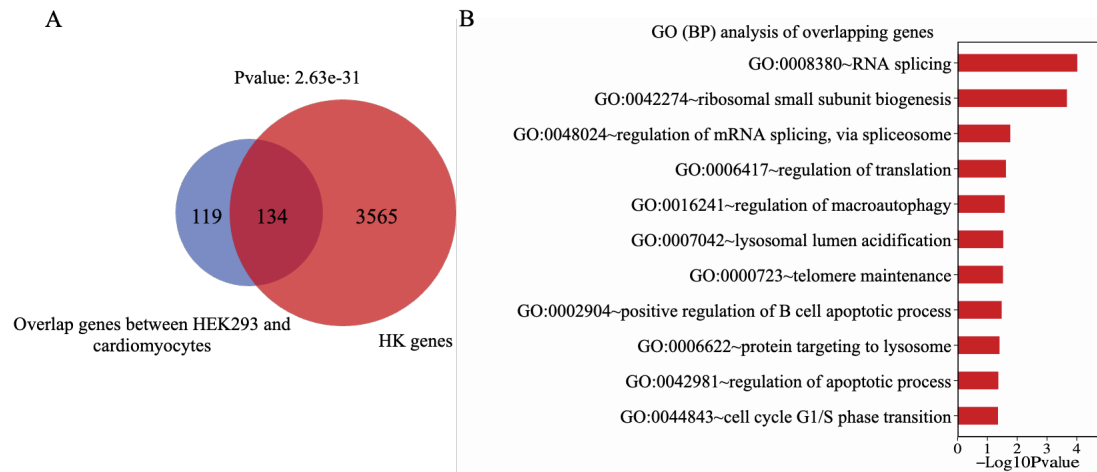

**Figure S4. Detailed information on the overlap of genes with sharp CHD6 peaks between HEK293 and cardiomyocytes.**

(A) Analysis of overlapping genes with enrichment in HK genes. (B) GO analysis of overlapping genes.
